# Supplementary material for: Ethynyl thiophene-appended unsymmetrical zinc porphyrin sensitizers for dye-sensitized solar cells
Source: Royal Society of Chemistry journal article supplement (doi:10.1039/c3ra47948j), 2014-01-01

## **Ethynyl Thiophene Appended Unsymmetrical Zinc Porphyrin Sensitizers for Dye-Sensitized Solar Cells: Synthesis, Spectral, Electrochemical, and Photovoltaic Properties**

P. Silviya Reeta,<sup>a</sup> L. Giribabu,<sup>a\*</sup> S.Senthilarasu,<sup>b</sup> Min-Hung Hsu,<sup>b</sup> D. Kishore Kumar,<sup>b</sup> Hari M. Upadhyaya,<sup>b\*</sup> Neil Robertson<sup>c\*</sup> and Tracy Hewat<sup>c</sup>

<sup>a</sup> Inorganic & Physical Chemistry Division, CSIR-Indian Institute of Chemical Technology, Uppal Road, Tarnaka, Hyderabad 500007 (A.P.), India.

<sup>b</sup>Energy Conversion Laboratory (ECL), Institute of Mechanical, Process and Energy Engineering (IMPEE), School of Engineering and Physical Sciences, Heriot-Watt University, Riccarton, Edinburgh, EH14 4AS.

<sup>c</sup> School of Chemistry and EaStCHEM, University of Edinburgh, King's Buildings, West Mains Road, Edinburgh EH93JJ, UK.

\*Author for correspondence E-mail: [giribabu@iict.res.in](mailto:giribabu@iict.res.in), **Phone:** +91-40-27193186, fax: +91-40-27160921

## Synthetic Scheme of PYR-Por-CA and PYR-Por-MA

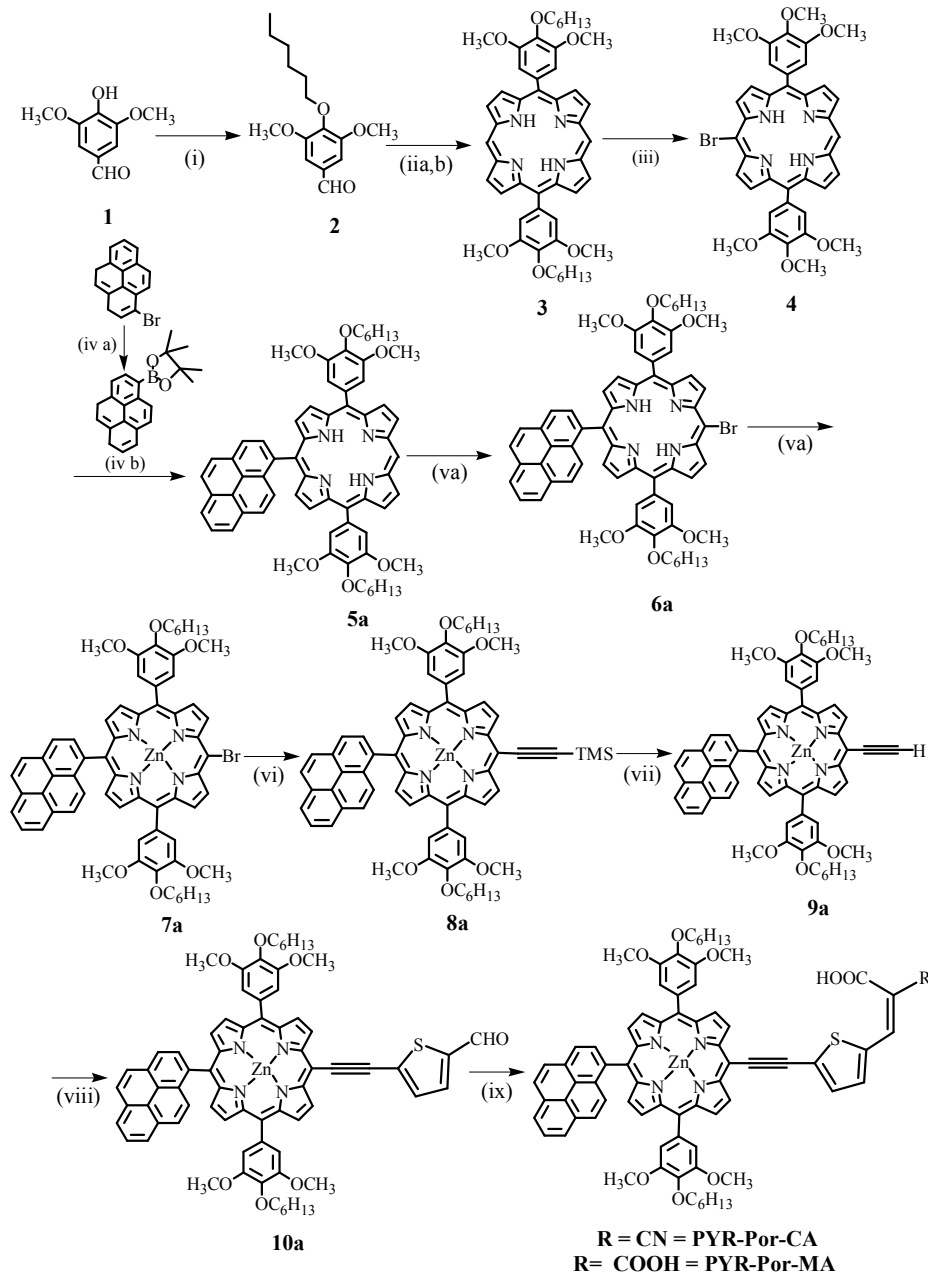

(i) DMF,  $K_2CO_3$ , reflux 4h (iia) Dipyrromethane,  $CH_2Cl_2$ , TFA, RT (iib) DDQ, TEA, RT (iii) NBS,  $CH_2Cl_2$ , RT (iva,b)  $Pd(PPh_3)_4$ ,  $Cs(CO)_3$ , Toluene, reflux, 12h (va) NBS,  $CH_2Cl_2$ , RT (vb)  $Zn(OAc)_2$ ,  $CHCl_3/CH_3OH$ , reflux, 2h (vi) TMSA, TEA,  $Pd(PPh_3)_2Cl_2$ , CuI, 50 °C, 8h (vii)  $K_2CO_3$ ,  $CH_3OH/CH_2Cl_2$ , RT, 3h (viii) 5-bromothiophene-2-carboxaldehyde, TEA,  $Pd(PPh_3)_2Cl_2$ , CuI, 50 °C, 8h (ix) Cyanoacetic acid (**PYR-Por-CA**) or malonic acid (**PYR-Por-MA**),  $CHCl_3/CH_3CN$  (3:1), piperidine, reflux, 8h.

## Synthetic Scheme of FLU-Por-CA and FLU-Por-MA

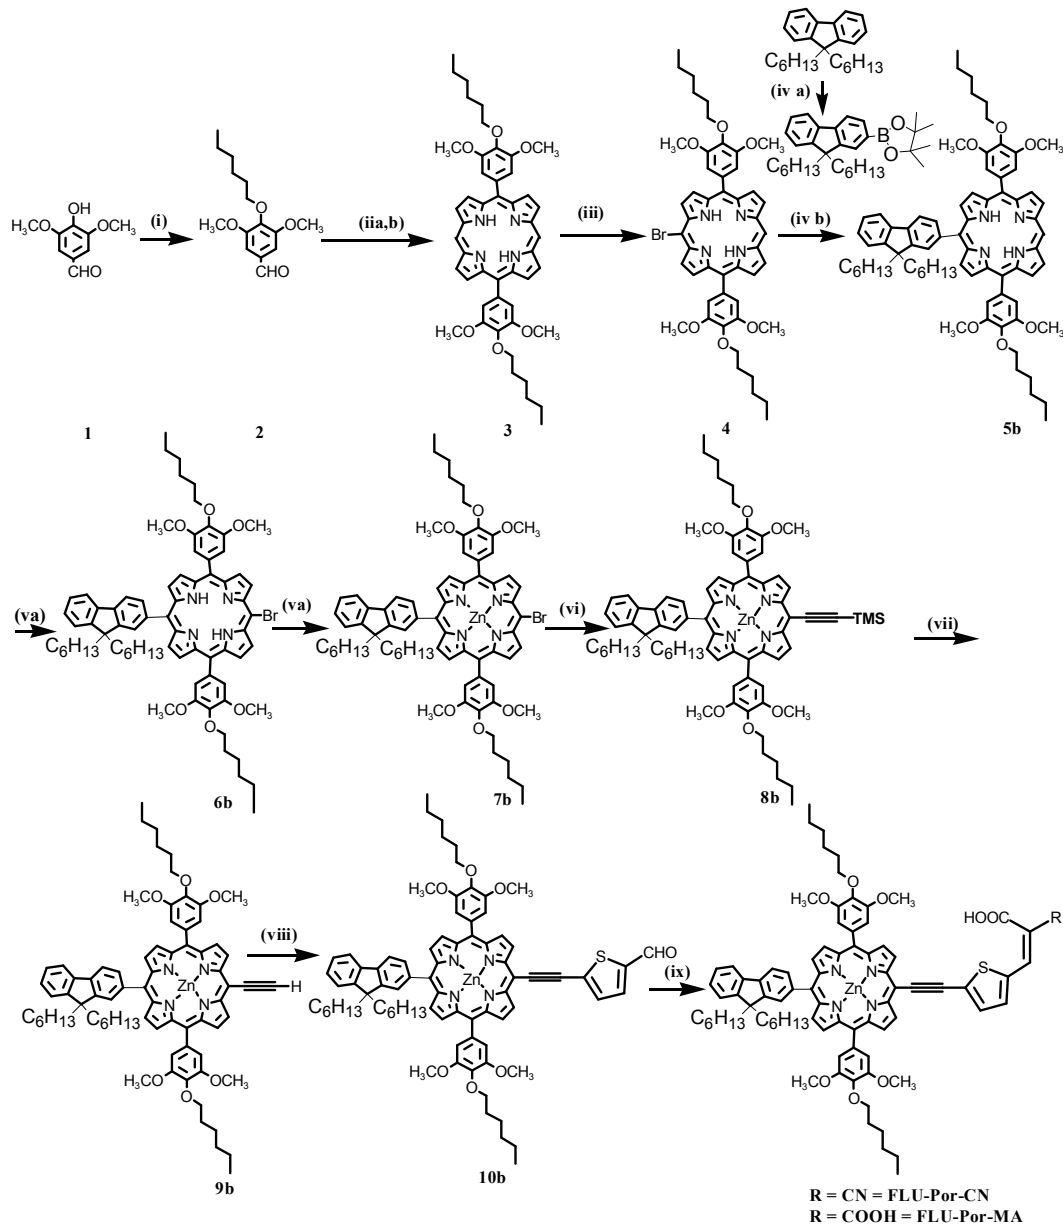

(i) DMF,  $K_2CO_3$ , reflux 4h (iia) Dipyrromethane,  $CH_2Cl_2$ , TFA, RT (iib) DDQ, TEA, RT (iii) NBS,  $CH_2Cl_2$ , RT (iva,b)  $Pd(PPh_3)_4$ ,  $Cs(CO)_3$ , Toluene, reflux, 12h (va) NBS,  $CH_2Cl_2$ , RT (vb)  $Zn(OAc)_2$ ,  $CHCl_3/CH_3OH$ , reflux, 2h (vi) TMSA, TEA,  $Pd(PPh_3)_2Cl_2$ , CuI, 50 °C, 8h (vii)  $K_2CO_3$ ,  $CH_3OH/CH_2Cl_2$ , RT, 3h (viii) 5-bromothiophene-2-carboxaldehyde, TEA,  $Pd(PPh_3)_2Cl_2$ , CuI, 50 °C, 8h (ix) Cyanoacetic acid (**FLU-Por-CA**) or malonic acid (**FLU-Por-MA**),  $CHCl_3/CH_3CN$  (3:1), piperidine, reflux, 8h.

## Detailed Synthetic Procedure:

### *4-(hexyloxy)-3,5-dimethoxybenzaldehyde (2)*

3,5-dimethoxy-4-hydroxy-benzaldehyde (5g, 0.0275 mole), 1-hexylbromide (7.7 ml, 0.055 mole) and  $K_2CO_3$  were added to 10 ml of dried, dry DMF under nitrogen atmosphere. The reaction mixture was heated to reflux for 4h. After cooling to room temperature, the solution was extracted with ice cold water and ether. The organic phase was collected and evaporated to dryness. The brown liquid was purified by silica gel column using hexane/ $CHCl_3$  (2:1 v/v) mixture as eluent to yield pale yellow oil (92%). Elemental analysis of Anal. Calcd. For  $C_{15}H_{22}O_4$  (266.33): C, 67.64; H, 8.33. Found: C, 67.60; H, 8.30. ESI-MS (m/z):  $C_{15}H_{22}O_4$  [266.33]:  $M^+$  266 (100%).  $^1H$  NMR ( $CDCl_3$ ,  $\delta$ ppm): 9.87 (s, 1H), 7.05 (s, 2H), 3.94 (m, 2H), 3.73 (s, 6H), 1.75 (m, 2H), 1.29 (m, 6H), 0.96 (m, 3H).

### *5,15-Bis[4-(hexyloxy)-3,5-dimethoxyphenyl]porphyrin (3)*

Lindsey method was adopted for the synthesis of this porphyrin. This route involves the condensation of dipyrromethane and the substituted benzaldehyde in dry  $CH_2Cl_2$ . The reaction mixture was degassed for 15min by purging with nitrogen, followed by drop wise addition of trifluoro acetic acid (TFA). The reaction mixture was protected from ambient light and allowed to stir at RT for 3h under nitrogen atmosphere. DDQ was added and the reaction mixture was allowed to stir for further 1h followed by quenching the acid catalyst using triethyl acetate (TEA). The product was purified by silica gel column chromatography using  $CH_2Cl_2$  as the eluant to yield purple powder (15% yield). Elemental analysis of Anal. Calcd. For  $C_{48}H_{54}N_4O_6$  (782.96): C, 73.63; H, 6.95; N, 7.16. Found: C, 73.60; H, 6.97; N, 7.20. ESI-MS (m/z):  $C_{48}H_{54}N_4O_6$  [782.96]:  $M^+$  784 (100%).  $^1H$  NMR ( $CDCl_3$ ,  $\delta$ ppm): 10.35 (s, 2H), 9.05 (dd, 8H), 7.51 (s, 4H), 4.15 (m, 4H), 3.95 (s, 12H), 2.00 (m, 4H), 1.55 (m, 12H), 0.96 (m, 6H), -3.05 (b, 2H). UV-Vis ( $CH_2Cl_2$ )  $\lambda_{max}$  (nm) ( $\log \epsilon$   $M^{-1} cm^{-1}$ ): 410(5.81), 504(4.20), 539(3.8), 577(3.74), 632(3.21).

### *5-bromo-10,20-Bis[4-(hexyloxy)-3,5-dimethoxyphenyl]porphyrin (4)*

Porphyrin (3) (100mg, 0.13mmol) was dissolved in 80ml of  $CH_2Cl_2$  and the solution was cooled to 0° C. To this N-bromosuccinamide (28mg, 0.16mmol in 8 ml of  $CH_2Cl_2$ ), was added drop

wise. The reaction was allowed to stir for 12 min, washed with water and purified by silica gel column chromatography using  $\text{CHCl}_3/\text{Hexane}$  (3:1 v/v) as the eluent. The second band was the desired product (50% yield). Elemental analysis of Anal. Calcd. For  $\text{C}_{48}\text{H}_{53}\text{BrN}_4\text{O}_6$  (861.86): C, 66.89; H, 6.20; N, 6.50. Found: C, 66.90; H, 6.30; N, 7.50. ESI-MS ( $m/z$ ):  $\text{C}_{48}\text{H}_{53}\text{BrN}_4\text{O}_6$  [861.86]:  $\text{M}^+ - \text{Br}$  784 (100%).  $^1\text{H}$  NMR ( $\text{CDCl}_3$ ,  $\delta$ ppm): 10.35 (s, 1H), 9.82 (d, 2H), 9.15 (d, 2H), 9.00 (dd, 4H), 7.45 (s, 4H), 4.20 (m, 4H), 3.95 (s, 12H), 2.00 (m, 4H), 1.55 (m, 12H), 0.97 (m, 6H), -3.00 (b, 2H). UV-Vis ( $\text{CH}_2\text{Cl}_2$ )  $\lambda_{\text{max}}$  (nm) ( $\log \epsilon \text{ M}^{-1} \text{ cm}^{-1}$ ) : 419(5.75), 514(3.30), 549(3.75), 589(3.71), 646(4.20).

*5-pyrenyl-10,20- Bis[4-(hexyloxy)-3,5-dimethoxypheyl]porphyrin (5a)*

Monobromo porphyrin (**4**) (190 mg, 0.24 mmol) was dissolved in 40 ml of dry Toluene, to which  $\text{CsCO}_3$  (393.6 mg, 1.2 mmol),  $\text{Pd(PPh}_3)_4$  (0.25 equivalents) and 1-pyrenylborane (218 mg, 0.713 mmol) were added and the reaction mixture was refluxed under nitrogen atmosphere for 12 h. After cooling to RT, the crude mixture was purified using silica gel column with EtOAc/Hex (1:4 v/v) to afford the desired product (90% yield). Elemental analysis of Anal. Calcd. For  $\text{C}_{64}\text{H}_{62}\text{N}_4\text{O}_6$  (983.20): C, 78.18; H, 6.36; N, 5.70. Found: C, 78.20; H, 6.33; N, 5.68. ESI-MS ( $m/z$ ):  $\text{C}_{64}\text{H}_{62}\text{N}_4\text{O}_6$  [983.20]: M 984 (100%).  $^1\text{H}$  NMR ( $\text{CDCl}_3$ ,  $\delta$ ppm): 10.25 (s, 1H), 9.37 (d, 2H), 9.14 (d, 2H), 8.90 (dd, 2H), 8.70 (s, 1H), 8.46 (m, 6H), 8.05 (m, 2H), 7.45 (m, 6H), 4.28 (m, 4H), 3.95 (s, 12H), 1.99 (m, 4H), 1.55 (m, 12H), 0.97 (m, 6H), -2.78 (b, 2H). UV-Vis ( $\text{CH}_2\text{Cl}_2$ )  $\lambda_{\text{max}}$  (nm) ( $\log \epsilon \text{ M}^{-1} \text{ cm}^{-1}$ ): 419 (5.81), 511 (4.44), 547(3.85), 584 (3.81), 640 (3.33).

*5-fluorenyl-10,20- Bis[4-(hexyloxy)-3,5-dimethoxypheyl]porphyrin (5b)*

This compound was synthesized by adopting a similar procedure that was used to prepare **5a**.  $^1\text{H}$  NMR( $\text{CDCl}_3$ , 300MHz):  $\delta$  = 2.95 (s, 2H), 0.78 (m, 12H), 0.98 (m, 8H), 1.25 (m, 8H), 1.45 (m, 10H), 1.60 (m, 4H), 2.1 (m, 8H), 3.95 (s, 12H), 4.31(t, 4H), 7.50 (m, 7H), 7.91-8.29 (m, 4H), 8.94(d, 4H), 9.13(d, 2H), 9.35 (s, 2H), 10.21 (s, 1H). ESI-MS:  $m/z$   $\text{C}_{73}\text{H}_{86}\text{N}_4\text{O}_6$ : calculated : 1115.49, found : 1115 [ $\text{M}^+$ ]. UV-Vis ( $\text{CH}_2\text{Cl}_2$ )  $\lambda_{\text{max}}$ (nm) ( $\log \epsilon$ ): 272 (1.5), 306 (4.4), 418 (5.9), 512 (4.3), 547 (3.9), 587 (3.8), 641(3.5).

*5-pyrenyl-15-bromo-10,20- Bis[4-(hexyloxy)-3,5-dimethoxypheyl]porphyrin (6a)*

Pyrenyl porphyrin (**5a**) (65mg, 0.065mmol) was dissolved in 30 ml of CH<sub>2</sub>Cl<sub>2</sub> and the solution was cooled to 0° C. To this N-bromosuccinamide (14.3mg, 0.078 mmol dissolved in 3 ml of CH<sub>2</sub>Cl<sub>2</sub>), was added drop wise. The reaction was allowed to stir for 12 min, washed with water and purified by silica gel column chromatography using CHCl<sub>3</sub>/Hexane (3:1 v/v) as the eluent to get the desired product in 80% yield. Elemental analysis of Anal. Calcd. For C<sub>64</sub>H<sub>61</sub>BrN<sub>4</sub>O<sub>6</sub>% (1060.37): C, 72.37; H, 5.79; N, 5.28. Found: C, 72.35; H, 5.80; N, 5.30. ESI-MS (m/z): C<sub>64</sub>H<sub>61</sub>BrN<sub>4</sub>O<sub>6</sub> [1060.37]: M<sup>3+</sup> 1057 (50%), [C<sub>64</sub>H<sub>61</sub>BrN<sub>4</sub>O<sub>6</sub>-Br] 984 (100%). <sup>1</sup>H NMR (CDCl<sub>3</sub>, δppm): 9.71 (d, 2H), 9.14 (d, 2H), 8.90 (dd, 2H), 8.70 (s, 1H), 8.46 (m, 6H), 8.05 (m, 2H), 7.45 (m, 6H), 4.27 (m, 4H), 3.89 (s, 12H), 1.99 (m, 4H), 1.55 (m, 12H), 0.97 (m, 6H), -2.55 (b, 2H). UV-Vis (CH<sub>2</sub>Cl<sub>2</sub>) λ<sub>max</sub> (nm) (log ε M<sup>-1</sup> cm<sup>-1</sup>) : 427(5.90), 521(4.21), 557(3.80), 597(3.67), 654(3.50).

#### *5-fluorenyl-15-bromo-10,20- Bis[4-(hexyloxy)-3,5-dimethoxyphenyl]porphyrin (6b)*

This compound was synthesized by adopting a similar procedure that was used to prepare **6a** <sup>1</sup>H NMR(CDCl<sub>3</sub>, 300MHz): δ = 0.81 (m, 12H), 0.99 (m, 8H), 1.22 (m, 8H), 1.42 (m, 10H), 1.62 (m, 4H), 2.04 (m, 8H), 3.99 (s, 12H), 4.29 (m, 4H), 7.24 (m, 7H), 7.98 -8.27 (m, 4H), 8.99 (d, 4H), 9.05 (d, 2H), 9.29 (s, 2H). ESI-MS: m/z C<sub>73</sub>H<sub>85</sub>BrN<sub>4</sub>O<sub>6</sub> : calculated : 1194.38, found : 1195[(M+H)<sup>+</sup>]. UV-Vis(CH<sub>2</sub>Cl<sub>2</sub>) λ<sub>max</sub>(nm)( logε) : 268 (1.5), 307(4.4), 425(5.9), 521(4.3), 557(4.1), 599(3.7), 655(3.7).

#### *5-pyrenyl-15-bromo-10,20- Bis[4-(hexyloxy)-3,5-dimethoxyphenyl]porphyrin zinc(II) (7a)*

Porphyrin (**6a**) (50mg, 0.051 mmol) and Zn(OAc)<sub>2</sub> (0.51 mmol) were dissolved in CHCl<sub>3</sub>/MeOH (4:1 v/v) mixture and heated to reflux until Q-band absorption has changed. Then the reaction mixture cooled to RT, washed with water and recrystallised from CHCl<sub>3</sub>/MeOH mixture to yield 95% of **7**. Elemental analysis of Anal. Calcd. For C<sub>64</sub>H<sub>59</sub>BrN<sub>4</sub>O<sub>6</sub>Zn% (1125.47): C, 68.30; H, 5.28; N, 4.98. Found: C, 68.32; H, 5.30; N, 5.00. ESI-MS (m/z): C<sub>64</sub>H<sub>59</sub>BrN<sub>4</sub>O<sub>6</sub>Zn [1125.47]: M 1126 (50%). <sup>1</sup>H NMR (CDCl<sub>3</sub>, δppm): 9.77 (d, 2H), 9.10 (d, 2H), 8.81 (dd, 2H), 8.70 (s, 1H), 8.46 (m, 6H), 8.05 (m, 2H), 7.45 (m, 6H), 4.18 (m, 4H), 3.87 (s, 12H), 1.99 (m, 4H), 1.55 (m, 12H), 0.97 (m, 6H). UV-Vis (CH<sub>2</sub>Cl<sub>2</sub>) λ<sub>max</sub> (nm) (log ε M<sup>-1</sup> cm<sup>-1</sup>) 428(5.91), 554(4.22), 593(3.61).

*5-fluorenyl-15-bromo-10,20- Bis[4-(hexyloxy)-3,5-dimethoxypheyl]porphyrin  
zinc(II) (7b)*

This compound was synthesized by adopting a similar procedure that was used to prepare **7a**. <sup>1</sup>H NMR(CDCl<sub>3</sub>, 300MHz): δ = 0.88 (m,12H), 0.99(m, 8H), 1.30( m,8H), 1.45(m, 10H), 1.64 (m, 4H), 1.95 (m, 4H), 2.08 (m, 4H), 3.95(s, 12H), 4.26( t, 4H), 7.44(m, 7H), 7.92-8.20 (m, 4H), 8.97 (d, 4H), 9.10(d, 2H), 9.80 (s, 2H), 10.21(s, 1H) . ESI-MS: *m/z* C<sub>73</sub>H<sub>83</sub>BrN<sub>4</sub>O<sub>6</sub> : calculated : 1257.789, found : 1258 [(M+H)<sup>+</sup>]. UV-Vis(CH<sub>2</sub>Cl<sub>2</sub>) λ<sub>max</sub>(nm)( logε) : 263(4.4), 307(4.3), 426(5.9), 553(4.3), 594(4.4).

*5-pyrenyl-15-trimethylsilylethynyl-10,20-Bis[4-(hexyloxy)-3,5-dimethoxypheyl]porphyrin  
zinc(II) (8a)*

Porphyrin (**7a**) (64 mg, 0.056 mmol) and Pd(PPh<sub>3</sub>)<sub>2</sub>Cl<sub>2</sub> (6.91mg, 0.006mmol) were dissolved in 10 ml of dry triethyl amine (TEA) to which trimethylsilylacetylene (0.036ml, 0.28mmol) and CuI (1.14 mg, 0.006 mmol) were added and the solution was heated to 50 °C for 8h. After cooling to RT, the crude mixture was washed with water and extracted with CHCl<sub>3</sub>. The green product was subjected to silica gel column with CHCl<sub>3</sub>/Hexane (3:1 v/v) as the eluent to afford the desired product (85% yield). Elemental analysis of Anal. Calcd. For C<sub>69</sub>H<sub>68</sub>N<sub>4</sub>O<sub>6</sub>SiZn% (1142.77): C, 72.52; H, 6.00; N, 4.90. Found: C, 72.55; H, 5.98; N, 4.91. ESI-MS (*m/z*): C<sub>69</sub>H<sub>68</sub>N<sub>4</sub>O<sub>6</sub>SiZn [1142.77]: M<sup>+</sup> (35%). <sup>1</sup>H NMR (CDCl<sub>3</sub>, δppm): 9.73 (d, 2H), 9.03 (d, 2H), 8.90 (dd, 2H), 8.70 (s, 1H), 8.46 (m, 6H), 8.05 (m, 2H), 7.45 (m, 6H), 4.18 (m, 4H), 3.96 (s, 12H), 1.93 (m, 4H), 1.44 (m, 12H), 0.97 (m, 6H), 0.63 (s, 9H). UV-Vis (CH<sub>2</sub>Cl<sub>2</sub>) λ<sub>max</sub> (nm) (log ε M<sup>-1</sup> cm<sup>-1</sup>) : 434(5.83), 561(4.22), 603(3.91).

*5-fluorenyl-15-trimethylsilylethynyl-10,20-Bis[4-(hexyloxy)-3,5-dimethoxypheyl] porphyrin  
zinc(II) (8b)*

This compound was synthesized by adopting a similar procedure that was used to prepare **8a**. <sup>1</sup>H NMR(CDCl<sub>3</sub>, 300MHz): δ = 0.64 (s, 9H), 0.87 (m,12H), 0.98(m, 8H), 1.16 ( m,8H), 1.45(m, 10H), 1.46 (m, 4H), 1.99 (m, 4H), 2.11(m, 4H), 3.95(s, 12H), 4.26( t, 4H), 7.44(m, 7H), 7.92-8.20 (m, 4H), 8.97 (d, 4H), 9.10(d, 2H), 9.80 (s, 2H), 10.21(s, 1H) . ESI-MS: *m/z*

$C_{78}H_{92}N_4O_6SiZn$  : calculated : 1275.08, found : 1275  $[M^+]$ . UV-Vis( $CH_2Cl_2$ )  $\lambda_{max}(nm)$ (  $\log \epsilon$ ) : 265(4.3), 307(4.3), 434(5.6), 563(4.2), 605(4.0).

*5-pyrenyl-15-ethynyl-10,20-Bis[4-(hexyloxy)-3,5-dimethoxypheyl]porphyrin zinc(II) (9a)*

Porphyrin (**8a**) (65mg, 0.057mmol) and  $K_2CO_3$  (0.5g) were dissolved in 30 ml of  $CH_2Cl_2/MeOH$  mixture and allowed to stir at RT for 5h. The crude mixture was filtered to remove  $K_2CO_3$ , washed with water and extracted with  $CHCl_3$ . Purification by silica gel column using  $CHCl_3/Hexane$  (4:1 v/v) afforded a more polar green product (90% yield). Elemental analysis of Anal. Calcd. For  $C_{66}H_{60}N_4O_6Zn$  (1070.59): C, 74.04; H, 5.65; N, 5.23. Found: C, 74.00; H, 5.68; N, 5.20. ESI-MS ( $m/z$ ):  $C_{66}H_{60}N_4O_6Zn$  [1070.59]:  $M+Na$  (100).  $^1H$  NMR ( $CDCl_3$ ,  $\delta$ ppm): 9.82 (d, 2H), 9.12 (d, 2H), 8.80 (dd, 2H), 8.70 (s, 1H), 8.46 (m, 6H), 8.05 (m, 2H), 7.45 (m, 6H), 4.23 (m, 4H), 3.91 (s, 12H), 1.93 (m, 4H), 1.44 (m, 12H), 0.97 (m, 6H). UV-Vis ( $CH_2Cl_2$ )  $\lambda_{max}(nm)$  ( $\log \epsilon$   $M^{-1} cm^{-1}$ ) : 431(5.85), 557(4.54), 599(4.13).

*5-fluorenyl-15-ethynyl-10,20-Bis[4-(hexyloxy)-3,5-dimethoxypheyl]porphyrin zinc(II) (9b)*

This compound was synthesized by adopting a similar procedure that was used to prepare **9a**.  $^1H$  NMR( $CDCl_3$ , 300MHz):  $\delta$  = 0.86 (m, 12H), 0.99(m, 8H), 1.44( m, 8H), 1.55(m, 10H), 1.65 (m, 4H), 1.99 (m, 4H), 2.11 (m, 4H), 3.67 (s, 1H), 3.93(s, 12H), 4.33( t, 4H), 7.46(m, 7H), 7.90-8.25 (m, 4H), 8.98 (d, 4H), 9.12(d, 2H), 9.45 (s, 2H). ESI-MS:  $m/z$   $C_{75}H_{84}N_4O_6 Zn$ : calculated : 1202.90 , found : 1204  $[(M+2H)^+]$ . UV-Vis( $CH_2Cl_2$ )  $\lambda_{max}(nm)$ (  $\log \epsilon$ ) : 267(4.5), 308(4.4), 430(5.7), 557(4.3), 600(5.0).

*5-pyrenyl-15-(5-formylthiophene-2-yl)-10,20-Bis[4-(hexyloxy)-3,5-dimethoxypheyl]porphyrin zinc(II) (10a)*

Porphyrin **9a** (50 mg, 0.047 mmol) and  $Pd(PPh_3)_2Cl_2$  (5.75 mg ,0.005 mmol) were dissolved in 10 ml of dry TEA to which 5-bromothiophene-2-carboxaldehyde (44.16 mg, 0.025 ml, 0.23 mmol) and  $CuI$  ( 0.95 mg, 0.005 mmol) were added and the solution was heated to 50 °C for 8h. After cooling to RT, the crude mixture was washed with water and extracted with  $CHCl_3$ . The green product was purified using silica gel column with  $CHCl_3/Hexane$  (3:1 v/v) as the eluant to afford the desired product (85% yield). Elemental analysis of Anal. Calcd. For  $C_{71}H_{62}N_4O_7SZn$  (1180.72): C, 72.22; H, 5.29; N, 4.75. Found: C, 72.20; H, 5.30; N, 4.70. ESI-MS ( $m/z$ ):

C<sub>71</sub>H<sub>62</sub>N<sub>4</sub>O<sub>7</sub>SZn [1180.59]: M (100%). <sup>1</sup>H NMR (CDCl<sub>3</sub>, δppm): 10.11 (s, 1H), 9.90 (d, 1H), 9.77 (s, 1H), 9.20 (d, 2H), 8.77 (m, 3H), 8.50 (m, 6H), 8.21 (m, 2H), 7.83 (m, 4H), 7.45 (m, 7H), 6.90 (s, 1H), 4.22 (m, 4H), 3.93 (s, 12H), 1.93 (m, 4H), 1.44 (m, 12H), 0.97 (m, 6H). UV-Vis (CH<sub>2</sub>Cl<sub>2</sub>) λ<sub>max</sub> (nm) (log ε M<sup>-1</sup> cm<sup>-1</sup>): 426(5.83), 454(4.83), 566(3.82), 623(4.00).

*5-fluorenyl-15-(5-formylthiophene-2-yl)-10,20-Bis[4-(hexyloxy)-3,5-dimethoxyphenyl]porphyrin zinc(II) (10b)*

This compound was synthesized by adopting a similar procedure that was used to prepare **10a**. <sup>1</sup>H NMR(CDCl<sub>3</sub>, 300MHz): δ = 0.87 (m,12H), 0.99(m, 8H), 1.43 ( m,8H), 1.56(m, 10H), 1.63 (m, 4H), 2.00 (m, 4H), 2.12 (m, 4H), 3.92(s, 12H), 4.28 ( t, 4H), 7.15 (d, 1H), 7.35 (d, 1H), 7.44(m, 7H), 7.92-8.23 (m, 4H), 9.03 (m, 4H), 9.48 (d, 2H), 9.54(s, 2H), 9.64 (s, 1H). ESI-MS: *m/z* C<sub>80</sub>H<sub>86</sub>N<sub>4</sub>O<sub>7</sub>SZn : calculated : 1313.04, found : 1315 [(M+H)<sup>+</sup>]. UV-Vis (CH<sub>2</sub>Cl<sub>2</sub>) λ<sub>max</sub>(nm)(logε) : 267(4.5), 308(4.5), 423(5.6),453(sh, 5.1), 551(4.2), 621(4.0).

*5-pyrenyl-15-[(5-formylthiophene-2-yl)-2-cyanoacrylicacid]-10,20-Bis[4-(hexyloxy)-3,5-dimethoxyphenyl]porphyrin zinc(II) PYR-Por-CA:* Porphyrin **10a** (50 mg, 0.042 mmol) was dissolved in 30 ml of CH<sub>3</sub>CN/ CHCl<sub>3</sub> (3:1), to which piperidine and cyanoacetic acid (0.21 mmol) were added. The reaction mixture was refluxed for 8h. After cooling to RT, the reaction mixture was washed with water and 0.1M HCl and extracted with CH<sub>2</sub>Cl<sub>2</sub>. The product was purified with silica gel column using CH<sub>2</sub>Cl<sub>2</sub>/MeOH (3:1 v/v) as the eluant to afford the desired product (85% yield). Elemental analysis of Anal. Calcd. For C<sub>74</sub>H<sub>63</sub>N<sub>5</sub>O<sub>8</sub>SZn% (1247.77): C, 71.23; H, 5.09; N, 5.61 Found: C, 71.25; H, 5.10; N, 5.65. ESI-MS (*m/z*): C<sub>74</sub>H<sub>63</sub>N<sub>5</sub>O<sub>8</sub>SZn [1246]: M<sup>+</sup> (100%). <sup>1</sup>H NMR (CDCl<sub>3</sub>, δppm): 9.67 (s, 2H), 9.08 (s, 2H), 8.73 (m, 4H), 8.29 (m, 6H), 8.11 (m, 2H), 7.36 (m, 8H), 4.17 (m, 4H), 3.85 (s, 12H), 1.93 (m, 4H), 1.44 (m, 12H), 0.97 (m, 6H). UV-Vis (CH<sub>2</sub>Cl<sub>2</sub>) λ<sub>max</sub> (nm) (log ε M<sup>-1</sup> cm<sup>-1</sup>) : 447( 5.32), 575(4.04), 639(4.36).

*5-pyrenyl-15-[(5-formylthiophene-2-yl)methylene malonic acid]-10,20-Bis[4-(hexyloxy)-3,5-dimethoxyphenyl]porphyrin zinc(II) (PYR-Por-MA):* This compound was synthesized by analogous procedure of the previous compound. The only difference is that here malonic acid was taken instead of cyanacrylic acid. Elemental analysis of Anal. Calcd. For C<sub>74</sub>H<sub>64</sub>N<sub>4</sub>O<sub>10</sub>SZn% (1266.77): C, 70.16; H, 4.49; N, 5.61 Found: C, 70.15; H, 5.10; N, 4.51. ESI-MS (*m/z*): C<sub>74</sub>H<sub>64</sub>N<sub>4</sub>O<sub>10</sub>SZn% (1266.77): [1264] M<sup>2+</sup> (60%). <sup>1</sup>H NMR (CDCl<sub>3</sub>, δppm): 9.67 (s, 2H), 9.08 (s,

2H), 8.73 (m, 4H), 8.29 (m, 6H), 8.11 (m, 2H), 7.36 (m, 7H), 4.17 (m, 4H), 3.85 (s, 12H), 1.93 (m, 4H), 1.44 (m, 12H), 0.97 (m, 6H). UV-Vis(CH<sub>2</sub>Cl<sub>2</sub>)  $\lambda_{\text{max}}$  (nm) (log  $\epsilon$  M<sup>-1</sup> cm<sup>-1</sup>) : 468 (5.12), 580 (4.01), 654 (4.46).

5-fluorenyl-15-[(5-formylthiophene-2-yl)-2-cyanoacrylicacid]-10,20-Bis[4-(hexyloxy)-3,5-dimethoxyphenyl]porphyrin zinc(II) (**FLU-Por-CA**): This compound was synthesized by adopting a similar procedure that was used to prepare **11a**. <sup>1</sup>H NMR(CDCl<sub>3</sub>, 300MHz):  $\delta$  = 0.65 (m, 8H), 0.82(m, 12H), 1.23 ( m, 18H), 1.63 (m, 4H), 2.02 (m, 8H), 3.61(s, 12H), 4.23 ( m, 4H), 6.85 (d, 2H), 7.42(m, 8H), 7.92-8.05 (m, 4H), 9.03 (m, 4H), 9.61 (m, 4H). MALDI-TOF MS:  $m/z$  C<sub>83</sub>H<sub>87</sub>N<sub>5</sub>O<sub>8</sub>SZn: calculated: 1380.08, found: 1381 [(M+H)<sup>+</sup>]. UV-Vis (CH<sub>2</sub>Cl<sub>2</sub>)  $\lambda_{\text{max}}$ (nm)( log $\epsilon$ ) : 267(4.6), 308(4.5), 444(5.2), 575(4.2), 638(4.5).

5-fluorenyl-15-[(5-formylthiophene-2-yl)methylene malonic acid]-10,20-Bis[4-(hexyloxy)-3,5-dimethoxyphenyl]porphyrin zinc(II) (**FLU-Por-MA**): This compound was synthesized by adopting a similar procedure that was used to prepare **12a**. <sup>1</sup>H NMR(CDCl<sub>3</sub>, 300MHz):  $\delta$  = 0.87 (m, 12H), 0.99(m, 8H), 1.22 ( m, 17H), 1.63 (m, 4H), 1.98 (m, 8H), 3.92(s, 12H), 4.23 ( m, 4H), 7.03(d, 2H), 7.36 (m, 8H), 7.92-8.05 (m, 4H), 8.85 (m, 4H), 9.02 (d, 2H), 9.62(s, 2H). MALDI-TOF MS:  $m/z$  C<sub>83</sub>H<sub>88</sub>N<sub>4</sub>O<sub>10</sub>SZn: calculated: 1399.08, found: 1400 [(M+H)<sup>+</sup>]. UV-Vis (CH<sub>2</sub>Cl<sub>2</sub>)  $\lambda_{\text{max}}$ (nm)( log $\epsilon$ ) : 266 (4.6), 309(4.6), 448 (5.3), 572 (4.2), 632 (4.4).

## Absorption Spectra of Porphyrin Sensitizers in Dichloromethane

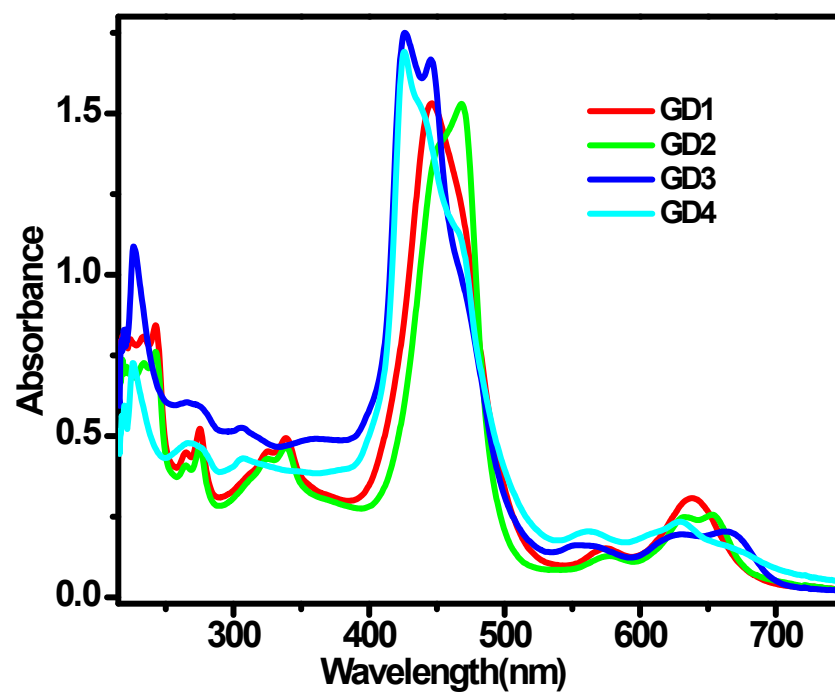

### Emission Spectra of Sensitizers in Dichloromethane

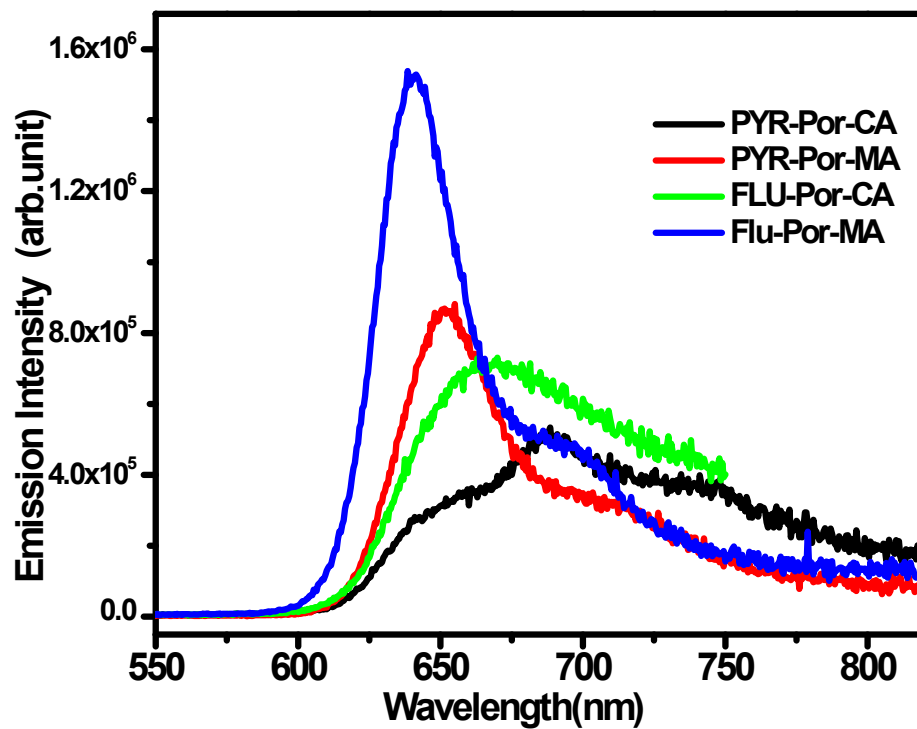

Cyclic voltammogram of PYR-Por-CA in  $\text{CH}_2\text{Cl}_2$  solvent, scan rate 100 mV/s.

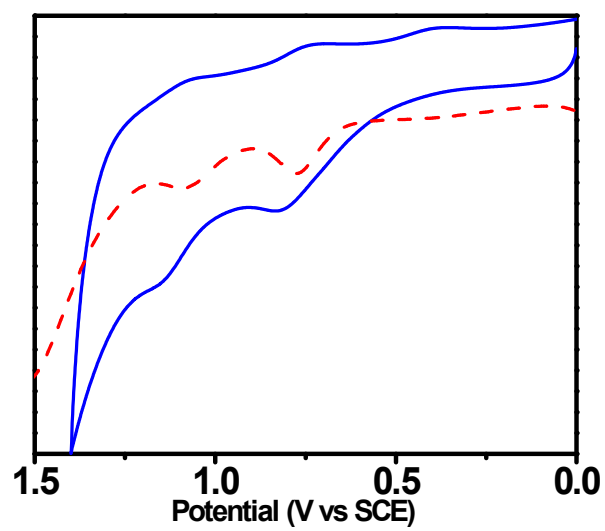

Fluorescence decay ( $\lambda_{\text{ex}} = 440 \text{ nm}$ ,  $\lambda_{\text{em}} = 650 \text{ nm}$ ) in Dichloromethane

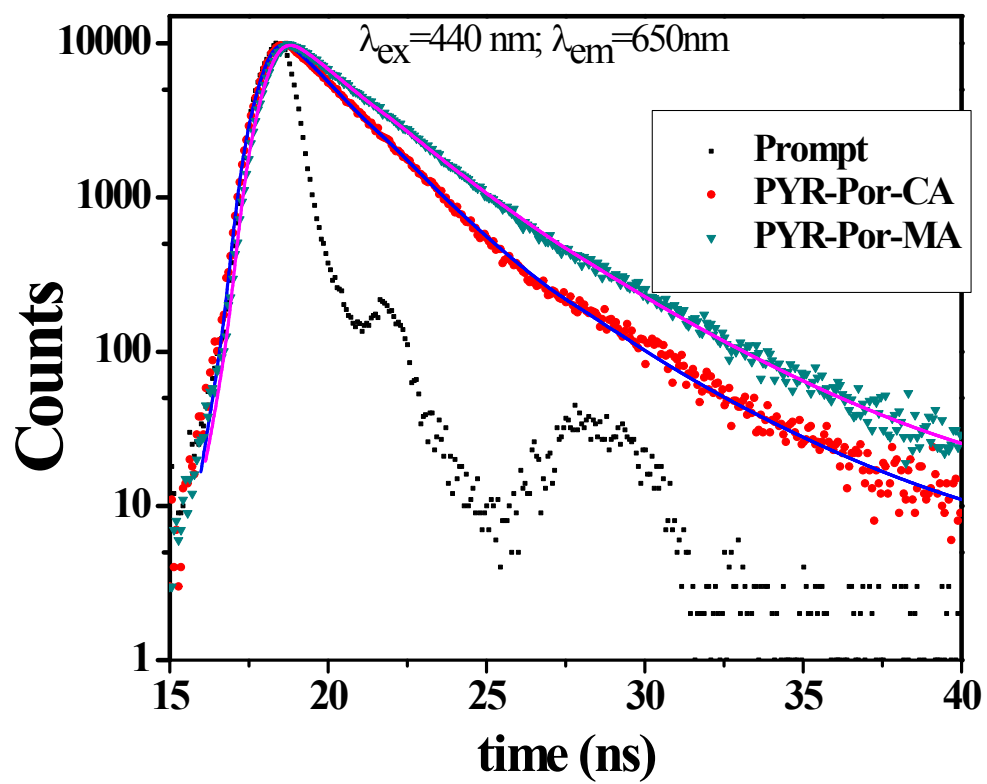

Fluorescence decay ( $\lambda_{\text{ex}} = 440 \text{ nm}$ ,  $\lambda_{\text{em}} = 650 \text{ nm}$ ) in Dichloromethane

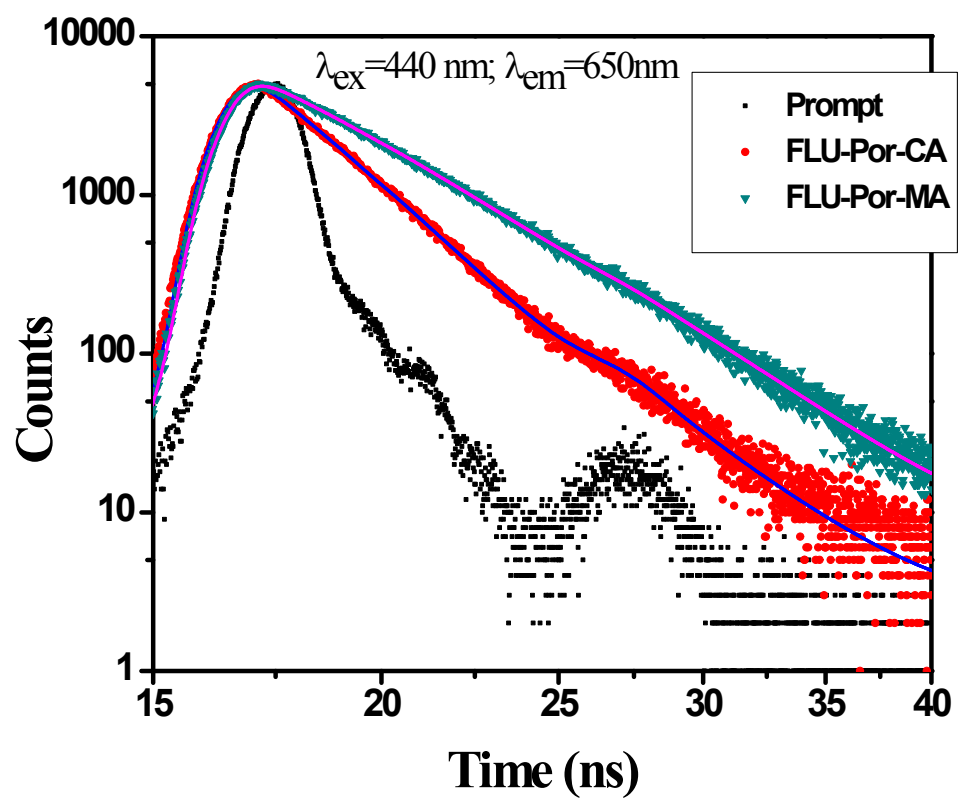

Electronic distribution computed in dichloromethane for the first occupied/unoccupied molecular orbitals of the PYR-Por-MA

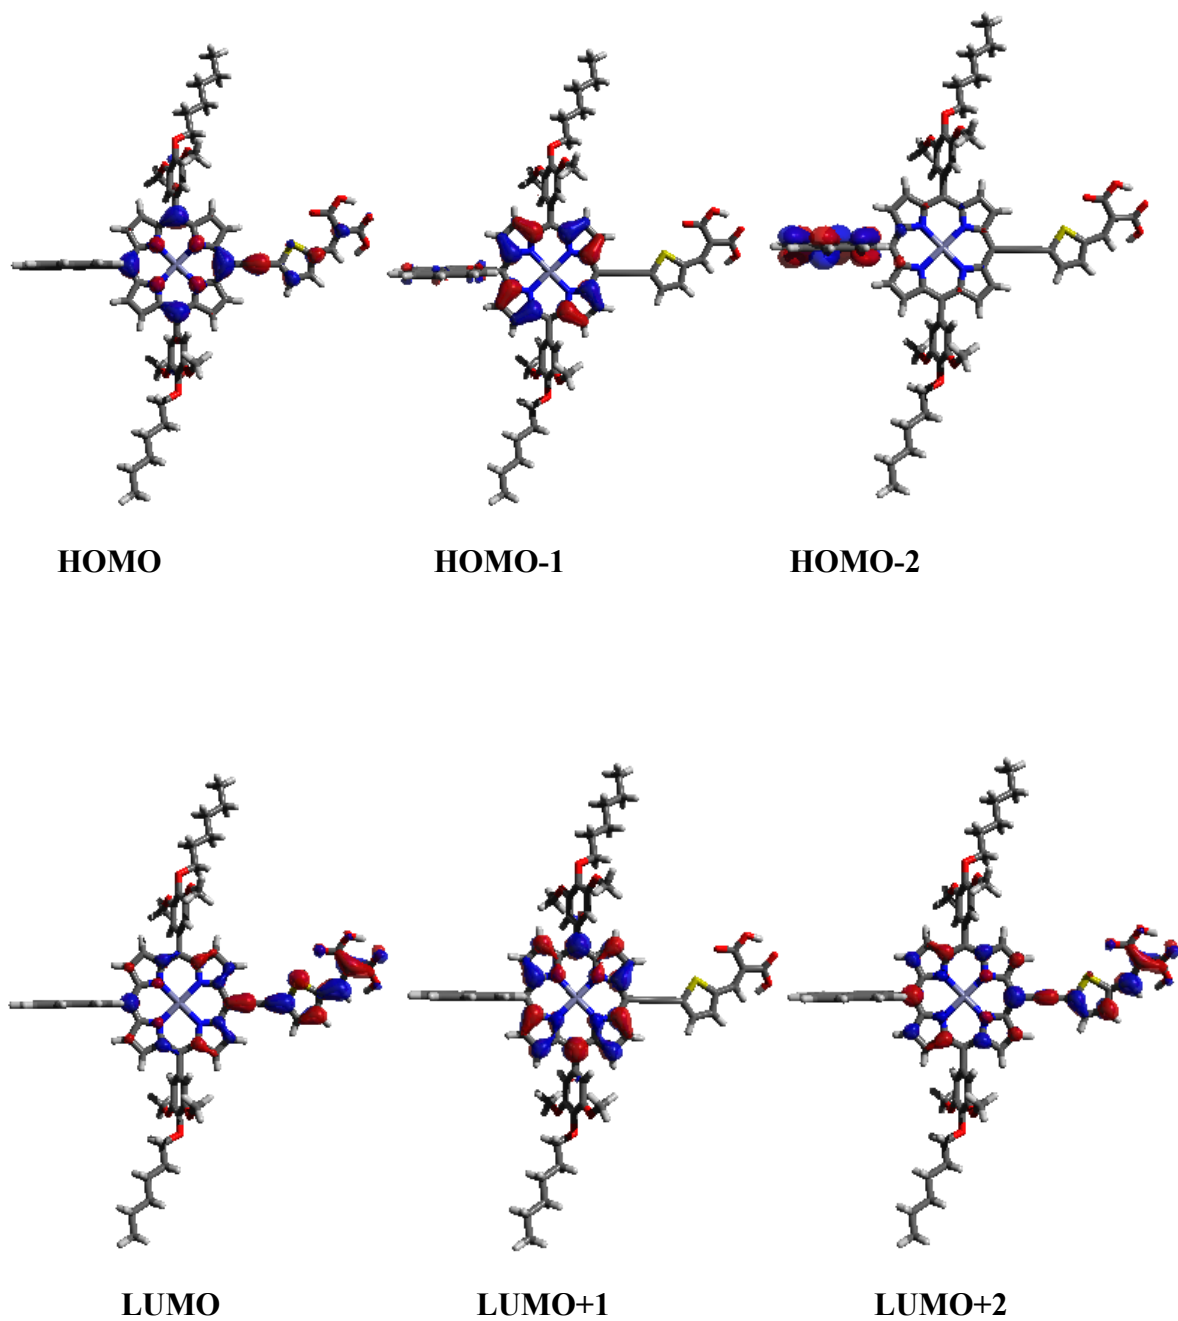

**Table** TD-DFT calculated visible absorption wavelengths for **PYR-Por-MA**, indicating the molecular orbitals involved and their relative contribution to the absorption.

| Main Visible Absorbance / nm | Main Charge Transitions |        | Oscillator Strength | Relative Contribution |
|------------------------------|-------------------------|--------|---------------------|-----------------------|
|                              | MO from                 | MO to  |                     |                       |
| 660                          | HOMO-1                  | LUMO+1 | 1.2618              | 17                    |
|                              | HOMO                    | LUMO   |                     | 83                    |
| 510                          | HOMO-1                  | LUMO+1 | 0.2452              | 36                    |
|                              | HOMO                    | LUMO   |                     | 11                    |
|                              | HOMO                    | LUMO+2 |                     | 53                    |
| 504                          | HOMO-2                  | LUMO   | 0.2403              | 9                     |
|                              | HOMO-1                  | LUMO   |                     | 23                    |
|                              | HOMO-1                  | LUMO+2 |                     | 28                    |
|                              | HOMO                    | LUMO+1 |                     | 40                    |
| 444                          | HOMO-7                  | LUMO   | 0.7911              | 34                    |
|                              | HOMO-2                  | LUMO+1 |                     | 16                    |
|                              | HOMO-1                  | LUMO+1 |                     | 28                    |
|                              | HOMO                    | LUMO+2 |                     | 22                    |
| 419                          | HOMO-7                  | LUMO+1 | 0.9655              | 9                     |
|                              | HOMO-6                  | LUMO   |                     | 7                     |
|                              | HOMO-4                  | LUMO+1 |                     | 11                    |
|                              | HOMO-2                  | LUMO+2 |                     | 17                    |
|                              | HOMO-1                  | LUMO   |                     | 6                     |
|                              | HOMO-1                  | LUMO+2 |                     | 30                    |
|                              | HOMO                    | LUMO+1 |                     | 20                    |

**Table** Percentage contributions from component parts of **PYR-Por-MA** to selected molecular orbitals. Also quoted are the calculated energies for these molecular orbitals.(Ar-based = trimethoxyaryl unit; S-based = thiophene-bisacetic acid unit)

| MO     | MO energy<br>/ eV | % Contribution from |                 |              |         |          |
|--------|-------------------|---------------------|-----------------|--------------|---------|----------|
|        |                   | Zn-based            | Porphyrin-based | Pyrene-based | S-based | Ar-based |
| HOMO-2 | -5.51             | 0.01                | 13.18           | 85.61        | 0.12    | 1.08     |
| HOMO-1 | -5.45             | 0                   | 82.37           | 10.40        | 0       | 7.23     |
| HOMO   | -5.19             | 0.85                | 61.82           | 3.06         | 23.88   | 10.39    |
| LUMO   | -3.04             | 0.15                | 33.89           | 1.95         | 62.28   | 1.73     |
| LUMO+1 | -2.42             | 0.23                | 88.47           | 1.46         | 0       | 9.84     |
| LUMO+2 | -2.33             | 0.14                | 51.78           | 3.11         | 42.71   | 2.26     |

The red dash curve is the calculated spectrum of Py\_MA in DCM and the solid columns are the calculated electronic transitions.

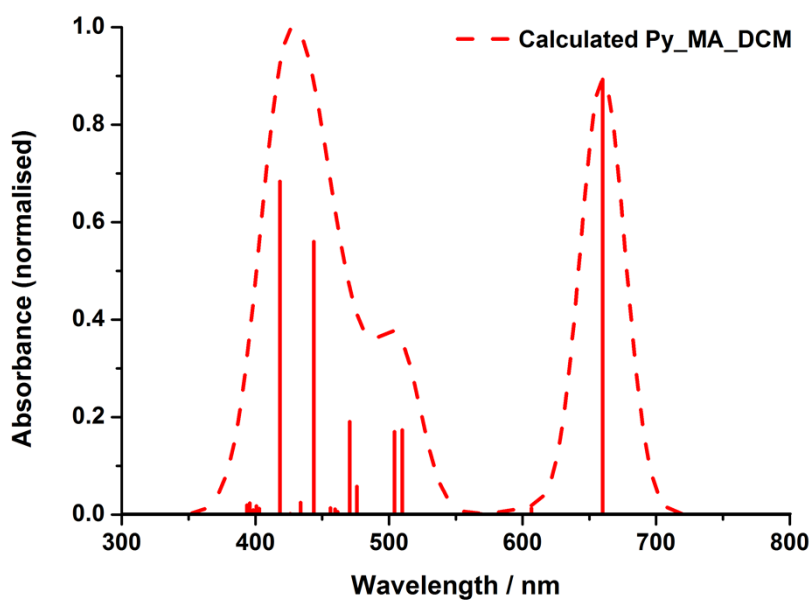

Oxidative OTTLE studies of **PYR-Por-MA** in 0.3 M TBABF<sub>4</sub>/DCM with an applied potential of +1 V (vs. Ag/AgCl).

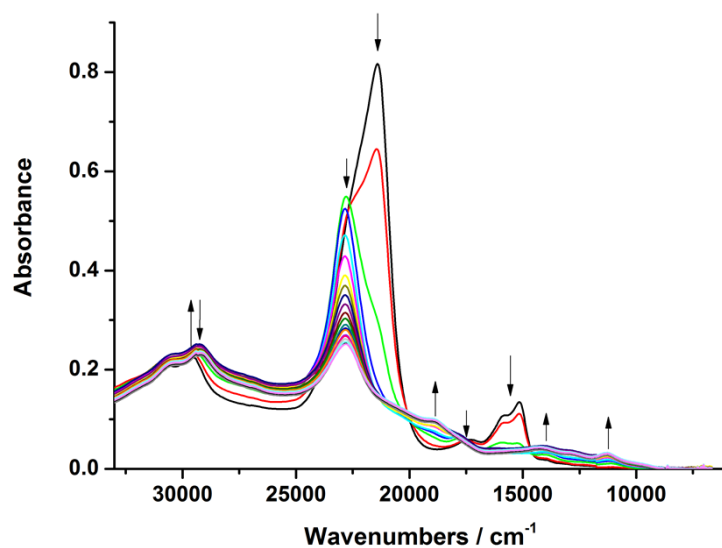

Overlay of initial and final spectra to show regeneration of **PYR-Por-MA** did not occur. The studies were carried out at -2 °C. The regeneration process was carried out at +0.2 V.

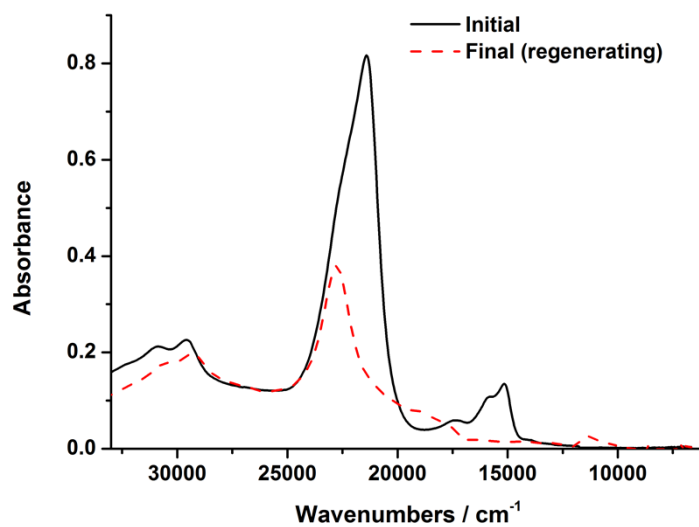

**Electronic distribution computed in dichloromethane for the first occupied/unoccupied molecular orbitals of FLU-Por-CA**

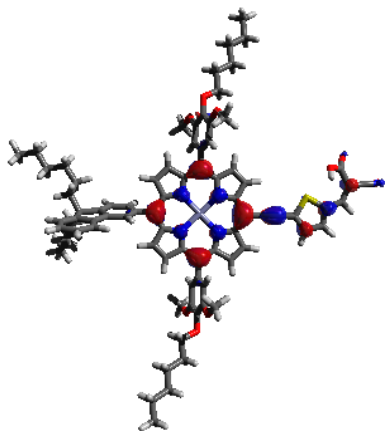

**HOMO**

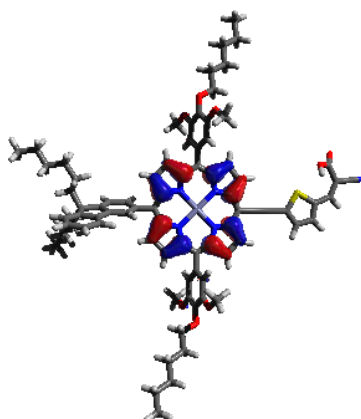

**HOMO-1**

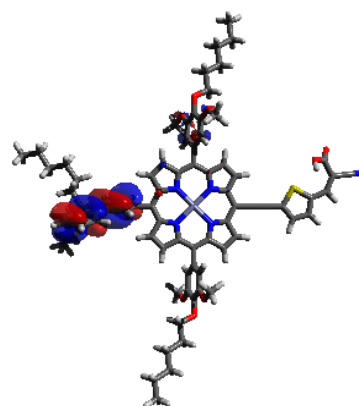

**HOMO-2**

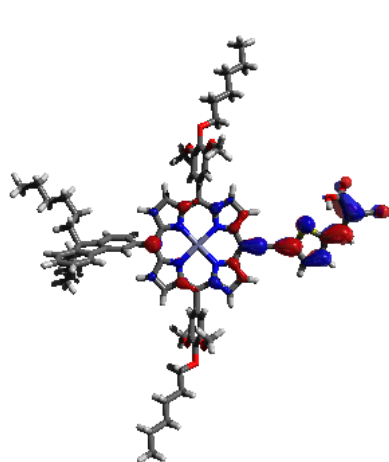

**LUMO**

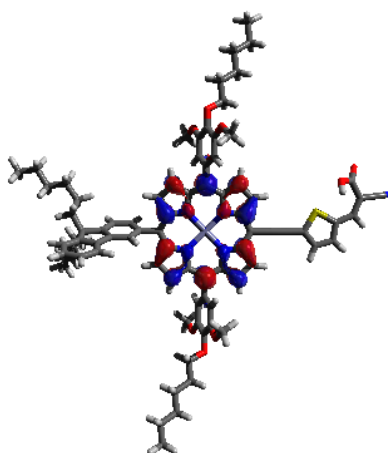

**LUMO+1**

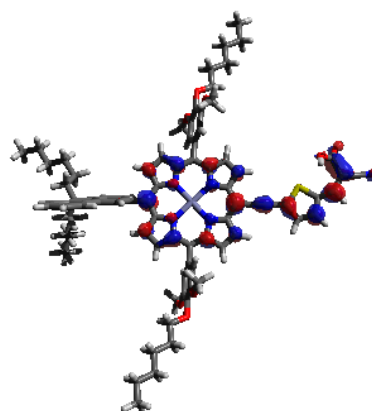

**LUMO+2**

**Table TD-DFT calculated visible absorption wavelengths for Flu-Por-CA indicating the molecular orbitals involved and their relative contribution to the absorption.**

| Main Visible Absorbance / nm | Main Charge Transitions |        | Oscillator Strength | Relative Contribution |
|------------------------------|-------------------------|--------|---------------------|-----------------------|
|                              | MO from                 | MO to  |                     |                       |
| 669                          | HOMO-1                  | LUMO+1 | 1.3051              | 16                    |
|                              | HOMO                    | LUMO   |                     | 84                    |
| 513                          | HOMO-1                  | LUMO+1 | 0.1754              | 36                    |
|                              | HOMO                    | LUMO   |                     | 10                    |
|                              | HOMO                    | LUMO+2 |                     | 54                    |
| 508                          | HOMO-1                  | LUMO   | 0.2007              | 25                    |
|                              | HOMO-1                  | LUMO+2 |                     | 31                    |
|                              | HOMO                    | LUMO+1 |                     | 44                    |
| 446                          | HOMO-7                  | LUMO   | 0.8759              | 41                    |
|                              | HOMO-1                  | LUMO+1 |                     | 35                    |
|                              | HOMO                    | LUMO+2 |                     | 24                    |
| 418                          | HOMO-7                  | LUMO+1 | 1.0313              | 9                     |
|                              | HOMO-6                  | LUMO   |                     | 9                     |
|                              | HOMO-4                  | LUMO+1 |                     | 14                    |
|                              | HOMO-1                  | LUMO   |                     | 7                     |
|                              | HOMO-1                  | LUMO+2 |                     | 38                    |
|                              | HOMO                    | LUMO+1 |                     | 23                    |

**Table** Percentage contributions from component parts of **Flu-Por-CA** to selected molecular orbitals. Also quoted are the calculated energies for these molecular orbitals. (Ar-based = trimethoxyaryl unit; S-based = thiophene-cyanoacetic acid unit)

| MO     | MO energy<br>/ eV | % Contribution from |                 |                |         |          |
|--------|-------------------|---------------------|-----------------|----------------|---------|----------|
|        |                   | Zn-based            | Porphyrin-based | Fluorene-based | S-based | Ar-based |
| HOMO-2 | -5.95             | 0.01                | 5.66            | 88.26          | 1.29    | 4.78     |
| HOMO-1 | -5.47             | 0                   | 89.12           | 3.00           | 0       | 7.88     |
| HOMO   | -5.20             | 0.87                | 62.41           | 3.92           | 23.31   | 9.49     |
| LUMO   | -3.08             | 0.16                | 31.66           | 1.77           | 64.90   | 1.51     |
| LUMO+1 | -2.43             | 0.23                | 88.11           | 2.08           | 0       | 9.58     |
| LUMO+2 | -2.36             | 0.14                | 54.15           | 3.14           | 40.49   | 2.08     |

**The red dash curve is the calculated spectrum of Flu-Por-CA in DCM and the solid columns are the calculated electronic transitions.**

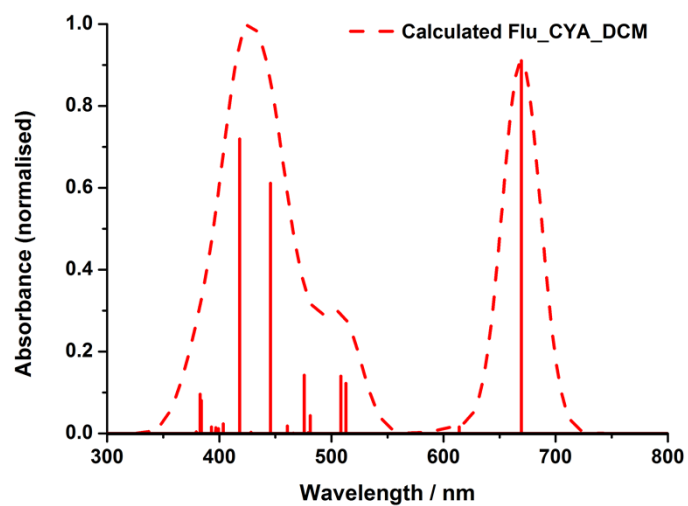

Oxidative OTTLE studies of **Flu-Por-CA** in 0.3 M TBABF<sub>4</sub>/DCM with an applied potential of +1 V (vs. Ag/AgCl).

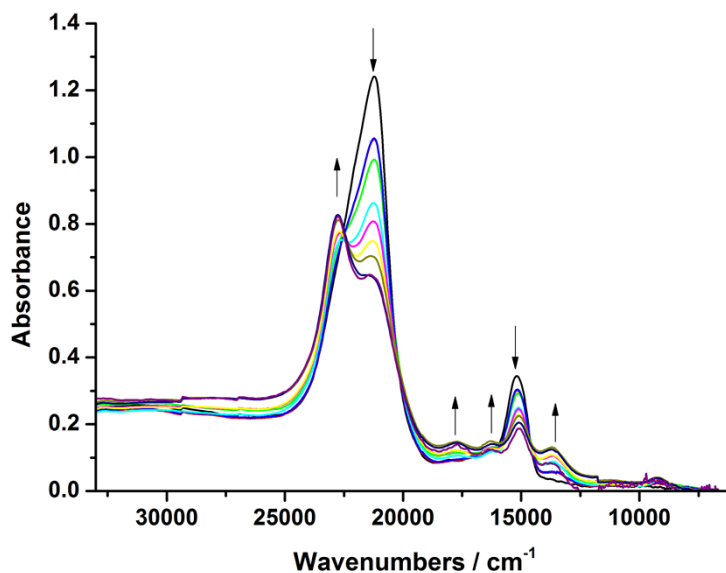

Overlay of initial and final spectra to show regeneration of **Flu-Por-CA** did not occur. The studies were carried out at -40 °C. The regeneration process was carried out at +0.15 V.

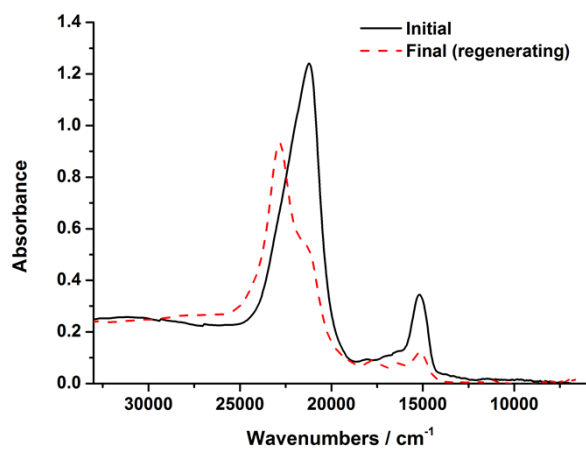

**Electronic distribution computed in dichloromethane for the first occupied/unoccupied molecular orbitals of FLU-Por-MA**

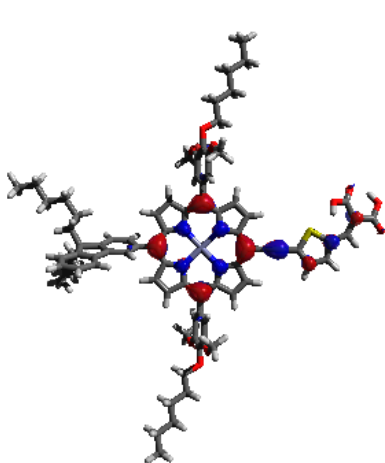

**HOMO**

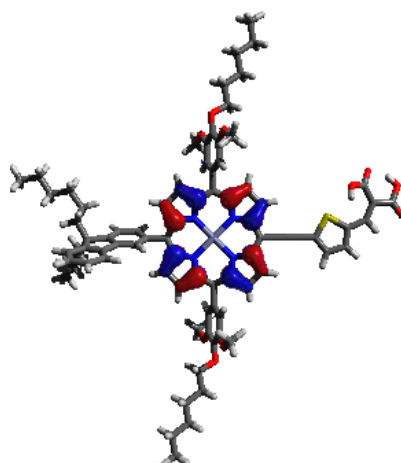

**HOMO-1**

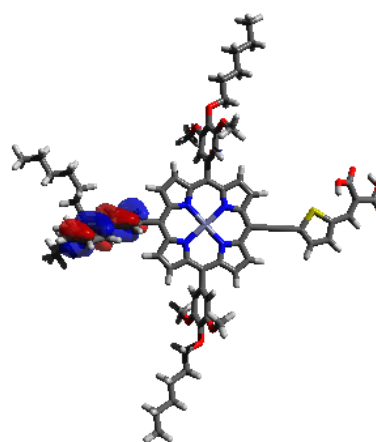

**HOMO-2**

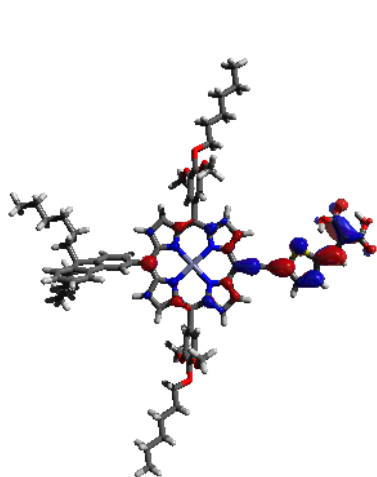

**LUMO**

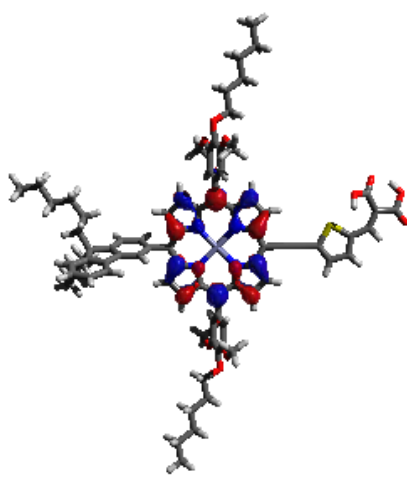

**LUMO+1**

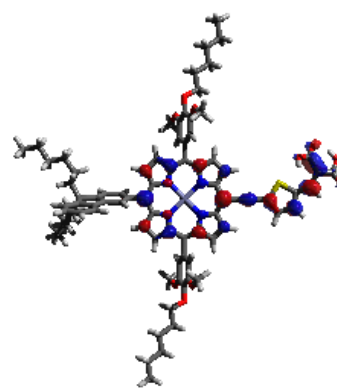

**LUMO+2**

**Table 1** TD-DFT calculated visible absorption wavelengths for **FLU-Por-MA**, indicating the molecular orbitals involved and their relative contribution to the absorption.

| Main Visible Absorbance / nm | Main Charge Transitions |        | Oscillator Strength | Relative Contribution |
|------------------------------|-------------------------|--------|---------------------|-----------------------|
|                              | MO from                 | MO to  |                     |                       |
| 674                          | HOMO-1                  | LUMO+1 | 1.2827              | 16                    |
|                              | HOMO                    | LUMO   |                     | 84                    |
| 515                          | HOMO-1                  | LUMO+1 | 0.1501              | 36                    |
|                              | HOMO                    | LUMO   |                     | 10                    |
|                              | HOMO                    | LUMO+2 |                     | 54                    |
| 510                          | HOMO-1                  | LUMO   | 0.1990              | 24                    |
|                              | HOMO-1                  | LUMO+2 |                     | 32                    |
|                              | HOMO                    | LUMO+1 |                     | 44                    |
| 445                          | HOMO-7                  | LUMO   | 0.8681              | 41                    |
|                              | HOMO-1                  | LUMO+1 |                     | 36                    |
|                              | HOMO                    | LUMO+2 |                     | 23                    |
| 419                          | HOMO-7                  | LUMO+1 | 1.0557              | 9                     |
|                              | HOMO-6                  | LUMO   |                     | 9                     |
|                              | HOMO-4                  | LUMO+1 |                     | 16                    |
|                              | HOMO-1                  | LUMO+2 |                     | 41                    |
|                              | HOMO                    | LUMO+1 |                     | 25                    |

**Table** Percentage contributions from component parts of **FLU-Por-MA** to selected molecular orbitals. Also quoted are the calculated energies for these molecular orbitals. (Ar-based = trimethoxyaryl unit; S-based = thiophene-bisacetic acid unit)

| MO     | MO energy<br>/ eV | % Contribution from |                 |                |         |          |
|--------|-------------------|---------------------|-----------------|----------------|---------|----------|
|        |                   | Zn-based            | Porphyrin-based | Fluorene-based | S-based | Ar-based |
| HOMO-2 | -5.95             | 0.01                | 5.71            | 88.55          | 0.89    | 4.84     |
| HOMO-1 | -5.47             | 0                   | 89.19           | 2.81           | 0       | 8.00     |
| HOMO   | -5.20             | 0.86                | 62.25           | 3.99           | 22.69   | 10.21    |
| LUMO   | -3.09             | 0.16                | 30.97           | 1.76           | 65.54   | 1.57     |
| LUMO+1 | -2.43             | 0.23                | 87.90           | 2.19           | 0       | 9.68     |
| LUMO+2 | -2.37             | 0.14                | 54.70           | 3.23           | 39.66   | 2.27     |

**The red dash curve is the calculated spectrum of FLU-Por-MA in DCM and the solid columns are the calculated electronic transitions.**

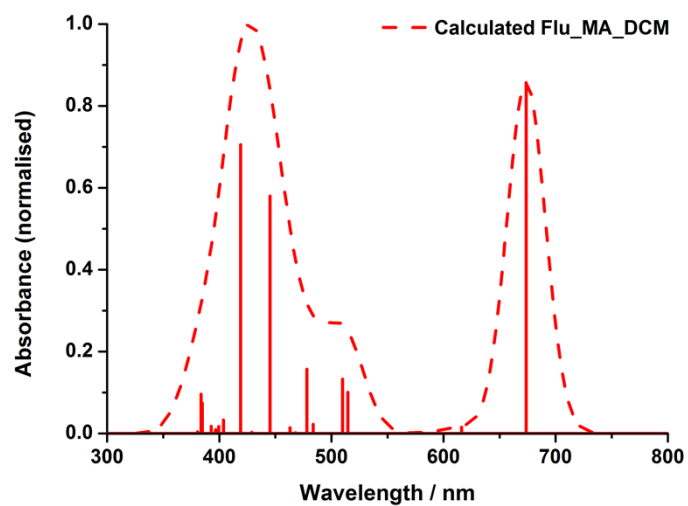

Oxidative OTTLE studies of **Flu\_MA** in 0.3 M TBABF<sub>4</sub>/DCM with an applied potential of +1 V (vs. Ag/AgCl).

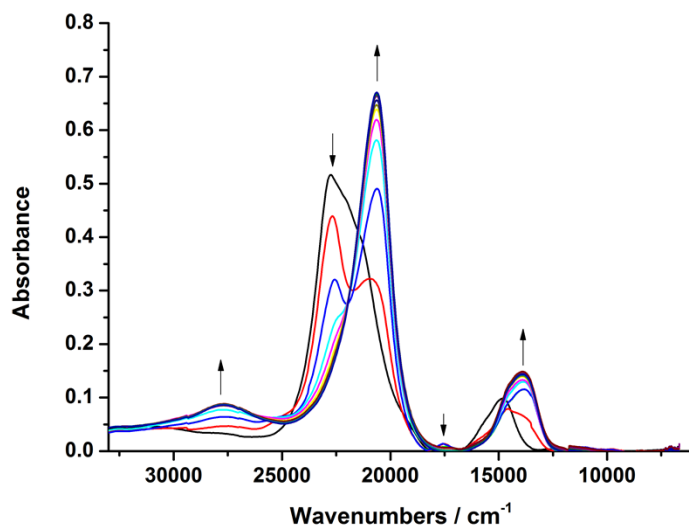

Overlay of initial and final spectra to show regeneration of **Flu\_MA** did not occur. The studies were carried out at -2 °C. The regeneration process was carried out at +0.2 V.

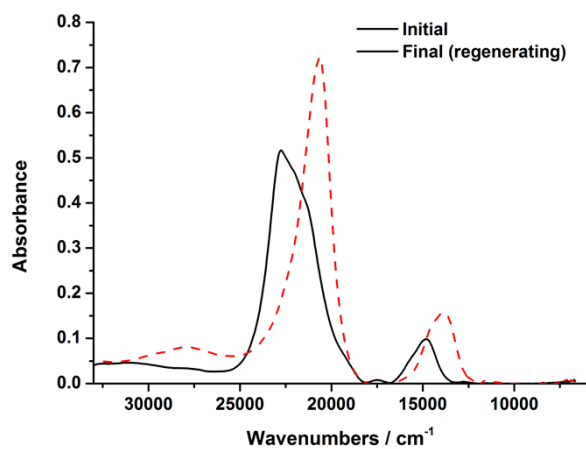

TG/DTG curves of **PYR-Por-MA** with heating rate of 10 °C min<sup>-1</sup> under Nitrogen atmosphere.

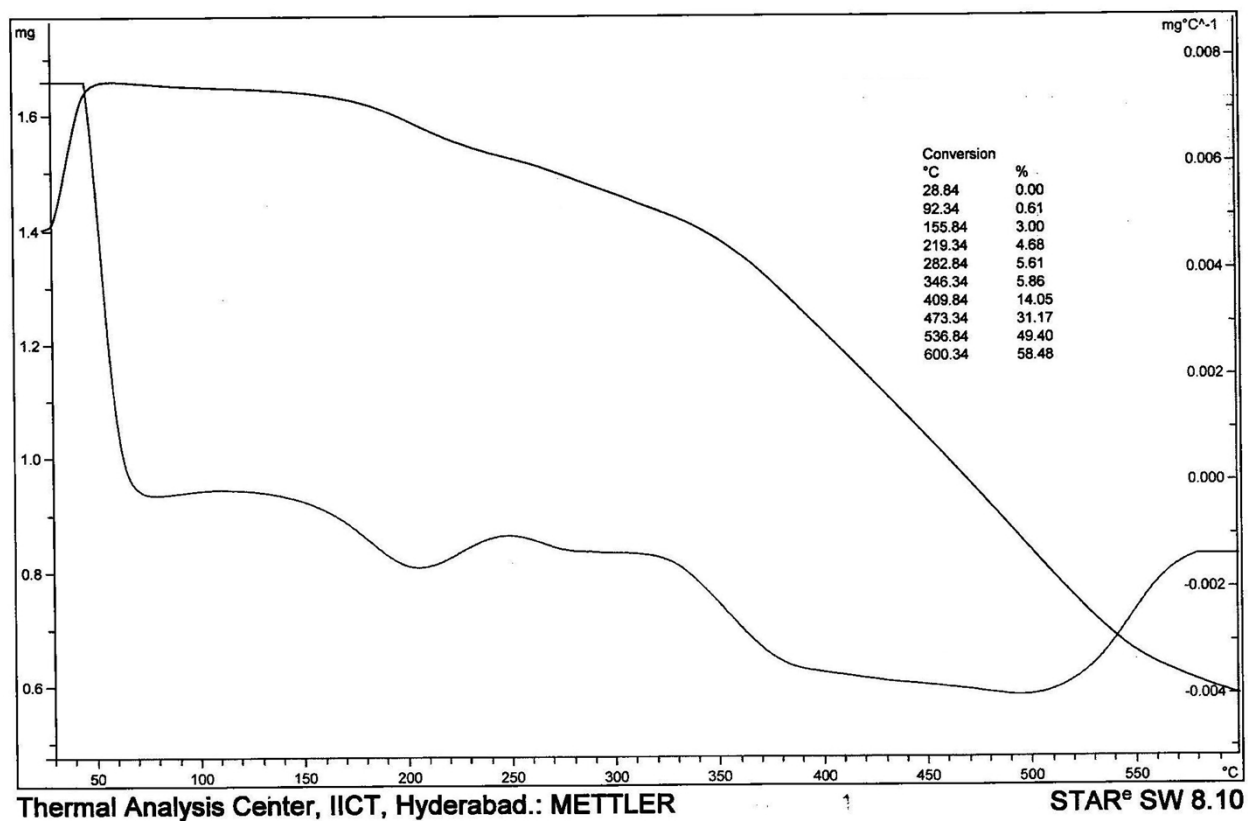

Supplement: c3ra47948j1.pdf [file c3ra47948j1.pdf]
